# Supplementary material
Source: publisher figshare collection journal article supplement (https://sage.figshare.com/ndownloader/files/12525998)
Supplement: Supplementary file 1 [file 12525998]

**Supplementary Table 6** –The corresponding mutation counts for each tumor type (Fresh frozen (FF-a) and formalin fixed paraffin embedded (FFPE-b)) that correspond to supplemental figure 2a and 2b, respectively.

**Suppl. Table 6a.**

| **FF** | **4S** | **5S** | **6S** | **GBE7** | **GBE8** | **GBE9** | **GBE13** | **MEG10** | **MEG11** | **MEG12** |
| --- | --- | --- | --- | --- | --- | --- | --- | --- | --- | --- |
| **C>A** | 15 | 8 | 3 | 8 | 13 | 16 | 13 | 16 | 71 | 89 |
| **C>G** | 9 | 5 | 0 | 6 | 10 | 5 | 5 | 8 | 26 | 45 |
| **C>T** | 29 | 25 | 16 | 18 | 34 | 29 | 34 | 26 | 69 | 88 |
| **T>A** | 3 | 3 | 4 | 2 | 6 | 4 | 3 | 6 | 20 | 55 |
| **T>C** | 10 | 3 | 6 | 6 | 7 | 3 | 10 | 10 | 28 | 71 |
| **T>G** | 2 | 2 | 1 | 3 | 2 | 1 | 2 | 0 | 7 | 12 |

**Suppl. Table 6b.**

| **FFPE** | **4S** | **5S** | **6S** | **GBE7** | **GBE8** | **GBE9** | **GBE13** | **MEG10** | **MEG11** | **MEG12** |
| --- | --- | --- | --- | --- | --- | --- | --- | --- | --- | --- |
| **C>A** | 19 | 23 | 12 | 24 | 18 | 20 | 16 | 18 | 73 | 73 |
| **C>G** | 13 | 12 | 8 | 22 | 13 | 14 | 13 | 17 | 38 | 56 |
| **C>T** | 49 | 61 | 51 | 57 | 52 | 51 | 72 | 59 | 102 | 97 |
| **T>A** | 3 | 8 | 11 | 8 | 6 | 8 | 9 | 8 | 21 | 55 |
| **T>C** | 32 | 24 | 27 | 23 | 25 | 15 | 22 | 27 | 43 | 97 |
| **T>G** | 7 | 9 | 6 | 6 | 8 | 4 | 5 | 6 | 11 | 17 |
